# Supplementary material
Source: publisher figshare collection journal article supplement (https://gsajournals.figshare.com/ndownloader/files/13628963)
Supplement: Supplementary file 1 [file 13628963]

## Sheet: Sheet1
Table S1. The trait mean values of the CCM traits for the wild-type (WT) and mutant (MT) siblings of the F1 hybrids of Oy1-N1989/oy1:B73 (pollen-parent) with respective IBM lines.
IBM_ID	WT_CCMI	MT_CCMI	Ratio_CCMI	Diff_CCMI	WT_CCMII	MT_CCMII	Ratio_CCMII	Diff_CCMII
M0001	45.3	6.3	0.139	39	49.6	17.5	0.353	32.1
M0003	35.5	8.3	0.234	27.2	37.3	16.2	0.434	21.1
M0007	46.8	4	0.085	42.8	54.8	5.8	0.106	49
M0008	47.4	10.3	0.217	37.1	51.9	16.1	0.31	35.8
M0010	48.2	11.4	0.237	36.8	42.9	18.6	0.434	24.3
M0013	33.7	8.7	0.258	25	47.7	16.3	0.342	31.4
M0014	54.6	3.5	0.064	51.1	47.3	5.1	0.108	42.2
M0016	52.3	3.2	0.061	49.1	43.9	6.2	0.141	37.7
M0017	54.3	9.3	0.171	45	67.9	21.4	0.315	46.5
M0018	34.3	8	0.233	26.3	51.2	18.2	0.355	33
M0019	36.9	8.4	0.228	28.5	40.9	14.5	0.355	26.4
M0021	50.1	3.6	0.072	46.5	65.4	5.4	0.083	60
M0022	46.3	8.6	0.186	37.7	45.7	15.8	0.346	29.9
M0023	47.9	3.1	0.065	44.8	55.2	3.8	0.069	51.4
M0024	47.1	8.6	0.183	38.5	50.3	19.2	0.382	31.1
M0025	49.6	3.6	0.073	46	57.9	6.9	0.119	51
M0028	35	4.3	0.123	30.7	52.5	5.5	0.105	47
M0029	47.8	11.8	0.247	36	41.9	19.6	0.468	22.3
M0031	41.9	3.2	0.076	38.7	54.9	5.2	0.095	49.7
M0032	57.9	4	0.069	53.9	52.3	7.1	0.136	45.2
M0033	46.5	12	0.258	34.5	52.9	19.5	0.369	33.4
M0036	39	3.3	0.085	35.7	54	4.6	0.085	49.4
M0039	52.6	4.1	0.078	48.5	52.4	5.7	0.109	46.7
M0040	42.2	11	0.261	31.2	62.9	22.5	0.358	40.4
M0042	53	10	0.189	43	47.4	18.6	0.392	28.8
M0044	42.8	2.8	0.065	40	52.7	4.4	0.083	48.3
M0045	41.8	6.9	0.165	34.9	42.4	12.6	0.297	29.8
M0047	35.7	4	0.112	31.7	36.7	8.1	0.221	28.6
M0048	30.3	6.4	0.211	23.9	35.5	18.2	0.513	17.3
M0051	40.2	4	0.1	36.2	45.6	7.3	0.16	38.3
M0052	53.1	10.7	0.202	42.4	56.3	15.5	0.275	40.8
M0054	50.6	8.4	0.166	42.2	43.7	13.9	0.318	29.8
M0055	38.6	16.9	0.438	21.7	37.7	24.5	0.65	13.2
M0056	41.6	8.8	0.212	32.8	44.9	18	0.401	26.9
M0057	47.9	9.2	0.192	38.7	45.4	19.6	0.432	25.8
M0060	44.3	3.7	0.084	40.6	54.9	6	0.109	48.9
M0061	43.3	11.2	0.259	32.1	64.7	29.3	0.453	35.4
M0062	43	11.4	0.265	31.6	62	20.6	0.332	41.4
M0063	55.5	11.6	0.209	43.9	55.2	20.5	0.371	34.7
M0066	47.9	9.1	0.19	38.8	50.4	21.5	0.427	28.9
M0067	41.3	8.6	0.208	32.7	44.9	13.6	0.303	31.3
M0074	48.5	3.7	0.076	44.8	48.5	4.9	0.101	43.6
M0076	56	3.9	0.07	52.1	64	6.5	0.102	57.5
M0077	49.1	3.1	0.063	46	44	6.7	0.152	37.3
M0079	42.9	9.9	0.231	33	46.4	18.3	0.394	28.1
M0080	39.2	6.1	0.156	33.1	52.6	15.4	0.293	37.2
M0081	41	3.3	0.08	37.7	58.3	5.4	0.093	52.9
M0082	45.5	3.2	0.07	42.3	58	4.9	0.084	53.1
M0083	49.2	9.9	0.201	39.3	54.7	22.8	0.417	31.9
M0085	41.7	3.8	0.091	37.9	36.3	3.7	0.102	32.6
M0086	58.4	9.5	0.163	48.9	65.2	24.8	0.38	40.4
M0088	48.2	11.4	0.237	36.8	53.8	27	0.502	26.8
M0092	53.7	10.4	0.194	43.3	60.5	27.5	0.455	33
M0093	51.4	6.7	0.13	44.7	51.9	12.6	0.243	39.3
M0097	48	4.9	0.102	43.1	56.9	7.4	0.13	49.5
M0098	49.5	7.4	0.149	42.1	64.9	17.5	0.27	47.4
M0099	59.8	3.1	0.052	56.7	55	6	0.109	49
M0101	41.8	8.4	0.201	33.4	50.1	22.7	0.453	27.4
M0106	44.1	5.5	0.125	38.6	51	16.8	0.329	34.2
M0109	43.1	7.3	0.169	35.8	52.9	18.4	0.348	34.5
M0110	43.9	4	0.091	39.9	46.5	7.1	0.153	39.4
M0113	53.8	10.1	0.188	43.7	59.4	24.5	0.412	34.9
M0114	36.3	7.4	0.204	28.9	52.3	20.8	0.398	31.5
M0116	46.6	8.7	0.187	37.9	50.2	16.5	0.329	33.7
M0118	43.2	10.1	0.234	33.1	39.8	18.7	0.47	21.1
M0119	42.7	4.3	0.101	38.4	46.5	6.4	0.138	40.1
M0121	51.8	10	0.193	41.8	43.7	19.5	0.446	24.2
M0124	35.8	8	0.223	27.8	39.4	18	0.457	21.4
M0125	39.6	10.6	0.268	29	40.1	16	0.399	24.1
M0127	57.4	7	0.122	50.4	49.6	24.1	0.486	25.5
M0129	49.4	3.6	0.073	45.8	41.5	6	0.145	35.5
M0130	45.7	8.1	0.177	37.6	51.5	23.3	0.452	28.2
M0131	39.5	10	0.253	29.5	62.2	26	0.418	36.2
M0133	43.2	2.8	0.065	40.4	56.3	4.7	0.083	51.6
M0134	43.2	6.3	0.146	36.9	42.9	11.2	0.261	31.7
M0138	50.3	9.8	0.195	40.5	47.9	24.7	0.516	23.2
M0141	37.5	2	0.053	35.5	41.8	3.7	0.089	38.1
M0142	45.3	8.4	0.185	36.9	62.3	15.5	0.249	46.8
M0146	48.8	9.8	0.201	39	52.3	15.9	0.304	36.4
M0147	44.8	3.5	0.078	41.3	46.3	6.7	0.145	39.6
M0153	52.1	9.7	0.186	42.4	47.3	14.5	0.307	32.8
M0154	49	3.3	0.067	45.7	55.6	6	0.108	49.6
M0156	51.4	10.3	0.2	41.1	74.1	16	0.216	58.1
M0157	49.4	9.7	0.196	39.7	61.3	20.7	0.338	40.6
M0159	47	10.2	0.217	36.8	50	12.3	0.246	37.7
M0160	36.3	4.2	0.116	32.1	57	7.5	0.132	49.5
M0161	44.8	3.3	0.074	41.5	53.9	7.4	0.137	46.5
M0162	54	3.8	0.07	50.2	56.7	5.6	0.099	51.1
M0165	51.3	3.2	0.062	48.1	51	6	0.118	45
M0168	46.4	4.1	0.088	42.3	45.9	8.4	0.183	37.5
M0169	44.8	11.7	0.261	33.1	49.1	21	0.428	28.1
M0170	43.1	8.1	0.188	35	46.1	25	0.542	21.1
M0171	45.9	8.5	0.185	37.4	48.7	26.7	0.548	22
M0174	54	3.5	0.065	50.5	60.9	8.7	0.143	52.2
M0176	30.1	3.5	0.116	26.6	49.1	5.1	0.104	44
M0177	40.6	3.5	0.086	37.1	53.1	5.2	0.098	47.9
M0178	45.9	8.8	0.192	37.1	55.1	23.4	0.425	31.7
M0180	45	8.1	0.18	36.9	52.5	17.9	0.341	34.6
M0181	38.7	8.3	0.214	30.4	72.7	17	0.234	55.7
M0182	37.1	3.5	0.094	33.6	48.6	7	0.144	41.6
M0183	42	7.5	0.179	34.5	44.3	16.5	0.372	27.8
M0184	55	4.7	0.085	50.3	56.4	8.6	0.152	47.8
M0185	35.7	6.6	0.185	29.1	38.6	12	0.311	26.6
M0186	25	2.5	0.1	22.5	51.7	3.8	0.074	47.9
M0189	50.1	13	0.259	37.1	50.8	17.3	0.341	33.5
M0191	50.2	3.8	0.076	46.4	55.4	6	0.108	49.4
M0192	42.5	2.6	0.061	39.9	46.2	3.9	0.084	42.3
M0194	48.2	12.4	0.257	35.8	51.8	17.8	0.344	34
M0195	43	8.6	0.2	34.4	43.5	18.3	0.421	25.2
M0196	46.1	10.5	0.228	35.6	62.5	26.3	0.421	36.2
M0197	52.8	8.3	0.157	44.5	60.5	22.2	0.367	38.3
M0198	55.4	8.9	0.161	46.5	65.5	21.9	0.334	43.6
M0199	49.7	9.2	0.185	40.5	50.4	21.4	0.425	29
M0200	41.4	9.1	0.22	32.3	45.4	19.1	0.421	26.3
M0201	40.6	3.4	0.084	37.2	40.1	5.7	0.142	34.4
M0204	35.9	3.8	0.106	32.1	38.9	5.9	0.152	33
M0205	39.4	5.7	0.145	33.7	41.8	13.6	0.325	28.2
M0206	53.2	9.7	0.182	43.5	45.3	18	0.397	27.3
M0208	54.7	10.1	0.185	44.6	53.2	18.6	0.35	34.6
M0209	54.7	10.9	0.199	43.8	52.2	18.8	0.36	33.4
M0214	51.1	9.5	0.186	41.6	59.8	19.8	0.331	40
M0215	45	4	0.089	41	60.2	6.2	0.103	54
M0216	42.2	10.3	0.244	31.9	51.4	23	0.447	28.4
M0218	52.1	3.3	0.063	48.8	56.1	5.4	0.096	50.7
M0219	43.4	10.2	0.235	33.2	53.5	14.1	0.264	39.4
M0220	42.7	8.3	0.194	34.4	51.1	18.2	0.356	32.9
M0222	49	11.2	0.229	37.8	42.6	21.9	0.514	20.7
M0223	47.7	7.7	0.161	40	67	18.4	0.275	48.6
M0224	50	8.7	0.174	41.3	58.5	28.6	0.489	29.9
M0225	44.2	3.6	0.081	40.6	45.1	5.5	0.122	39.6
M0228	36.6	9.9	0.27	26.7	38.8	15.5	0.399	23.3
M0229	45.7	10.9	0.239	34.8	45.9	20.1	0.438	25.8
M0232	42.6	9.9	0.232	32.7	45.4	17.5	0.385	27.9
M0233	39.9	6.7	0.168	33.2	48.6	15.1	0.311	33.5
M0237	59.3	3.5	0.059	55.8	47	6.6	0.14	40.4
M0240	57.3	3.2	0.056	54.1	57.6	6.7	0.116	50.9
M0241	42.7	8.9	0.208	33.8	49	15.3	0.312	33.7
M0244	54.6	4.1	0.075	50.5	51.8	5.3	0.102	46.5
M0248	44.3	10.6	0.239	33.7	66.4	22.3	0.336	44.1
M0250	44.3	3	0.068	41.3	61.5	3.8	0.062	57.7
M0253	47.3	2.9	0.061	44.4	41.5	4.6	0.111	36.9
M0255	39.9	3.1	0.078	36.8	44.8	4.8	0.107	40
M0256	48.8	3.2	0.066	45.6	57.7	5.4	0.094	52.3
M0258	41.9	6.6	0.158	35.3	54.2	24.8	0.458	29.4
M0262	48.8	3.7	0.076	45.1	56	5	0.089	51
M0263	40.9	3.2	0.078	37.7	63.2	4.5	0.071	58.7
M0264	50.2	3.7	0.074	46.5	50.7	5.5	0.108	45.2
M0265	43.1	7.4	0.172	35.7	56.8	15.5	0.273	41.3
M0266	44.1	9	0.204	35.1	52.2	17.5	0.335	34.7
M0267	47.9	7.6	0.159	40.3	45.7	13.7	0.3	32
M0269	44	8.6	0.195	35.4	50.1	18.6	0.371	31.5
M0270	66.2	12.3	0.186	53.9	56.5	23.6	0.418	32.9
M0271	47.4	12.7	0.268	34.7	51.4	21.8	0.424	29.6
M0272	43.6	4	0.092	39.6	55.5	4.8	0.086	50.7
M0274	43.1	8.9	0.206	34.2	46.5	23.5	0.505	23
M0275	52.9	5.9	0.112	47	47.1	13.7	0.291	33.4
M0276	50.6	7	0.138	43.6	57.2	14.6	0.255	42.6
M0277	47.4	9.1	0.192	38.3	52.3	27.8	0.532	24.5
M0279	38.8	3.5	0.09	35.3	40	6.1	0.153	33.9
M0280	43.6	9	0.206	34.6	36.2	15.8	0.436	20.4
M0282	44.8	3.2	0.071	41.6	42.6	5.9	0.138	36.7
M0286	61.7	3.1	0.05	58.6	48.4	5.1	0.105	43.3
M0287	47.4	3.4	0.072	44	46.2	5.5	0.119	40.7
M0292	46.6	3.7	0.079	42.9	42	6.2	0.148	35.8
M0295	53.5	9.1	0.17	44.4	51	18.1	0.355	32.9
M0296	56.7	3.2	0.056	53.5	58	7.2	0.124	50.8
M0297	44.9	8.8	0.196	36.1	53.7	13.8	0.257	39.9
M0298	50.3	8.4	0.167	41.9	48.5	22.4	0.462	26.1
M0300	43.5	6	0.138	37.5	46.7	19.8	0.424	26.9
M0301	45.6	8.4	0.184	37.2	45.4	17.2	0.379	28.2
M0304	45.7	3.5	0.077	42.2	53.8	5.4	0.1	48.4
M0305	43.3	6.9	0.159	36.4	42.3	17.7	0.418	24.6
M0307	27.9	2.9	0.104	25	40.2	3.4	0.085	36.8
M0311	37.9	8.1	0.214	29.8	52.3	18.6	0.356	33.7
M0313	43.3	3.4	0.079	39.9	50.7	5.6	0.11	45.1
M0314	39	9.5	0.244	29.5	42	18.4	0.438	23.6
M0318	44.3	3.9	0.088	40.4	56.9	6.2	0.109	50.7
M0321	59.3	3.4	0.057	55.9	55.1	4.6	0.083	50.5
M0322	41.7	8.2	0.197	33.5	38.9	18.5	0.476	20.4
M0325	44.8	7.2	0.161	37.6	58	19	0.328	39
M0326	58.5	4.1	0.07	54.4	56.1	8.5	0.152	47.6
M0328	45.4	3	0.066	42.4	48.7	4.5	0.092	44.2
M0331	44.4	6.2	0.14	38.2	49.3	11.2	0.227	38.1
M0334	50.7	8.8	0.174	41.9	60.3	18.5	0.307	41.8
M0335	36.2	6.5	0.18	29.7	44.4	11.5	0.259	32.9
M0337	46.7	10.7	0.229	36	48.4	25.2	0.521	23.2
M0340	49	10	0.204	39	54.6	22.4	0.41	32.2
M0341	45.3	3.2	0.071	42.1	48.6	4.1	0.084	44.5
M0344	51.7	3.8	0.074	47.9	45.6	5.8	0.127	39.8
M0345	42.7	9.3	0.218	33.4	49	16.2	0.331	32.8
M0346	46.2	10.1	0.219	36.1	48.4	19.8	0.409	28.6
M0347	53.5	4.2	0.079	49.3	60.1	8.8	0.146	51.3
M0349	52.8	4.3	0.081	48.5	59.2	6.9	0.117	52.3
M0351	34.4	7.3	0.212	27.1	59.8	25.5	0.426	34.3
M0352	40.9	11.5	0.281	29.4	52.3	24.1	0.461	28.2
M0353	52.9	10.1	0.191	42.8	60.1	23.4	0.389	36.7
M0354	45.4	3.4	0.075	42	56.2	5.6	0.1	50.6
M0355	48.4	9.5	0.196	38.9	58.5	20.1	0.344	38.4
M0356	49.7	4.5	0.091	45.2	59.7	7	0.117	52.7
M0357	53.4	10.6	0.199	42.8	46.2	18	0.39	28.2
M0358	44.5	7.2	0.162	37.3	50.4	17.2	0.341	33.2
M0360	39.1	11.4	0.292	27.7	52.3	18.9	0.361	33.4
M0361	29.7	3.5	0.118	26.2	41.8	4.9	0.117	36.9
M0362	36.8	8.9	0.242	27.9	56.4	15.1	0.268	41.3
M0364	46.2	11.4	0.247	34.8	60.2	17.8	0.296	42.4
M0368	51.1	6.9	0.135	44.2	55.3	19.8	0.358	35.5
M0369	48.7	10.2	0.209	38.5	49.4	17.3	0.35	32.1
M0372	44.3	3.7	0.084	40.6	42.7	6.3	0.148	36.4
M0373	49.4	3.6	0.073	45.8	59.2	4.9	0.083	54.3
M0378	53.4	7.4	0.139	46	64.5	16.2	0.251	48.3
M0379	42.6	3	0.07	39.6	52.7	3.8	0.072	48.9
M0380	49.7	12.2	0.245	37.5	70.3	30.4	0.432	39.9
M0381	40	9.5	0.238	30.5	43.6	28.9	0.663	14.7
M0382	48.7	8.6	0.177	40.1	57.2	20.6	0.36	36.6
M0383	55.7	2.7	0.048	53	50.1	4.9	0.098	45.2
M0384	27.3	2.5	0.092	24.8	46.8	4.2	0.09	42.6
